# Supplementary material for: Multi-omic analysis of subtype evolution and heterogeneity in high-grade serous ovarian carcinoma
Source: bioRxiv or medRxiv preprint supplement (doi:10.1101/554394), 2020-06-12
Supplement: Supplementary file [file media-1.pdf]

# **Multi-omic analysis supports a developmental hierarchy of molecular subtypes in HGS ovarian carcinoma**

Ludwig Geistlinger, Seyhun Oh, Marcel Ramos, Lucas Schiffer,  
Boris Winterhoff, Martin Morgan, Giovanni Parmigiani, Michael Birrer,  
Li-Xuan Qin, Markus Riester, Tim Starr, Levi Waldron

**Supplementary Material**

## Contents

### List of Figures

|    |                                                            |   |
|----|------------------------------------------------------------|---|
| S1 | Number of genome doublings per subtype . . . . .           | 2 |
| S2 | Association of SCNAs with transcriptome clusters . . . . . | 3 |
| S3 | Purity-stratified analysis . . . . .                       | 3 |
| S4 | Top subtype-associated regions . . . . .                   | 4 |
| S5 | Regions of frequent loss . . . . .                         | 5 |
| S6 | Single cell subtyping . . . . .                            | 6 |

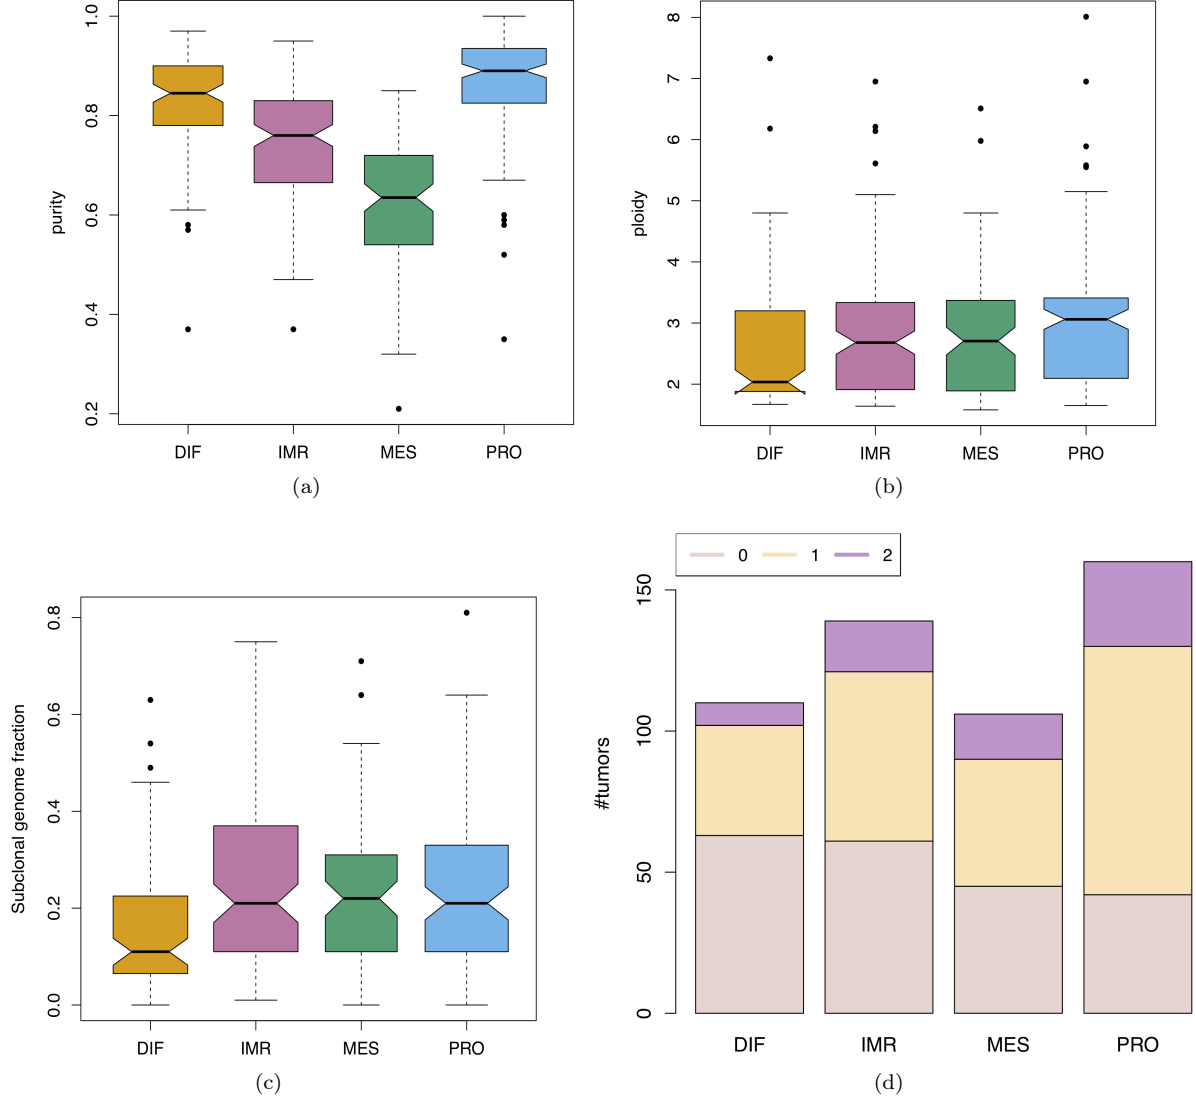

**Figure S1: Tumors of differentiated subtype are characterized by high purity, but significantly lower ploidy, subclonality, and number of genome doublings than the other three subtypes.** Subtype-stratified (a) purity, (b) ploidy, (c) subclonal genome fraction, and (d) number of genome doublings (0, 1, or 2) of TCGA HGS ovarian tumors as inferred by ABSOLUTE. Statistical significant differences in purity ( $p < 2^{-16}$ ), ploidy ( $p = 0.0026$ ), and subclonal genome fraction ( $p = 0.0041$ ) were observed between subtypes using one-way ANOVA. The number of genome doublings also differed significantly between subtypes ( $p = 8.2^{-5}$ ,  $\chi^2$  test,  $df = 6$ ).

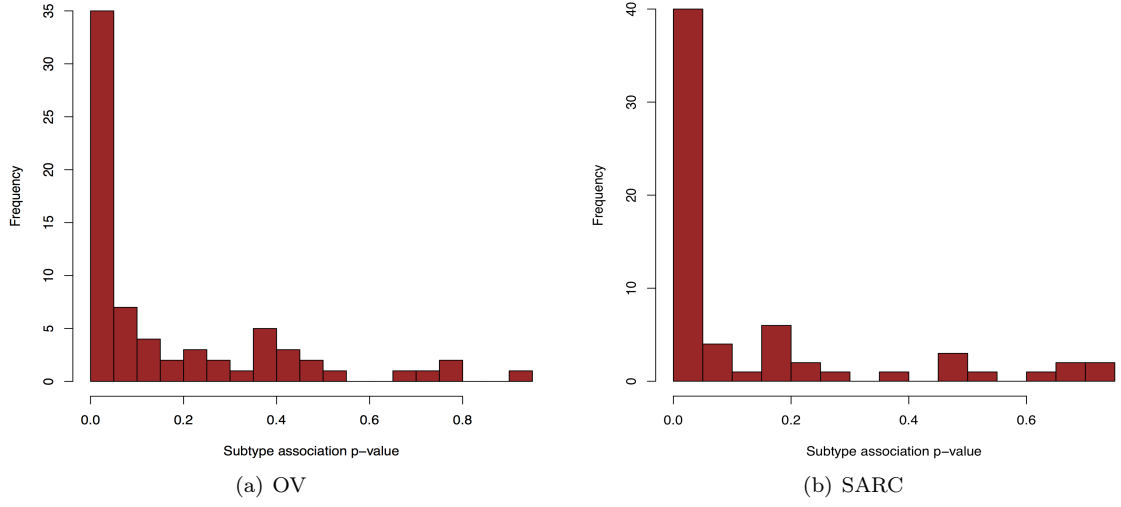

**Figure S2: Association of SCNAs with transcriptome clusters.** Shown is the distribution of nominal  $p$ -values as resulting from testing ( $\chi^2$  test with  $df = 6$ ) recurrent focal SCNAs detected with GISTIC2 for association with the TCGA transcriptome clusters for **(a)** 516 HGS ovarian tumors (70 SCNAs), and **(b)** 259 soft tissue sarcomas (64 SCNAs). See also Figure 3 of the main manuscript.

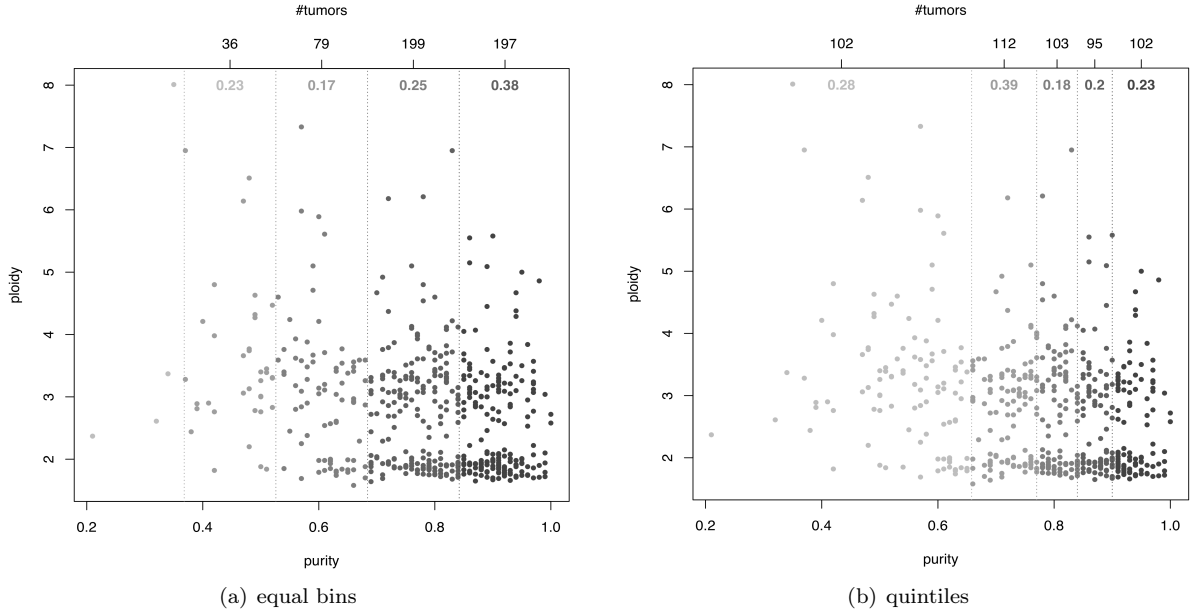

**Figure S3: Purity-stratified analysis.** The scatterplots show purity ( $x$ -axis) and ploidy ( $y$ -axis) of 516 HGS ovarian tumors as stratified by purity in **(a)** equal bins, and **(b)** quintiles. The number of tumors in each stratum is indicated on top of each plot. The correlation of subtype association and subclonality  $\rho(S_A, S_C)$  is shown at the top of each stratum, except for the first stratum in **(a)** due to insufficient sample size (4 tumors).

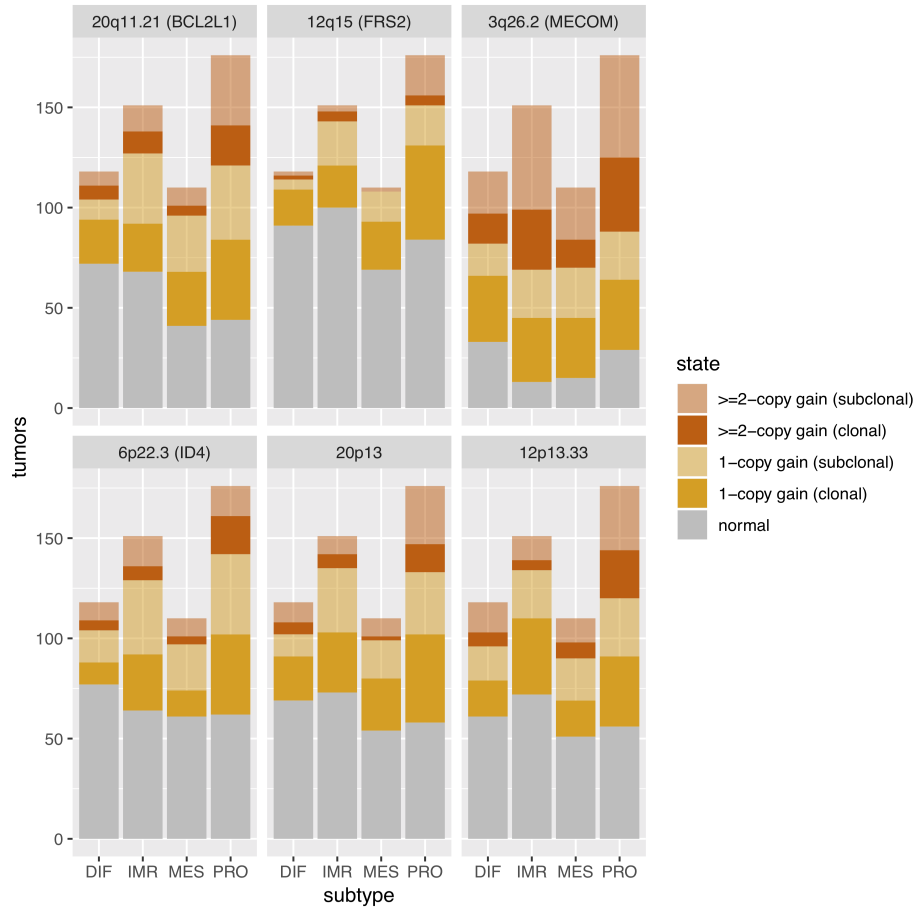

**Figure S4: Top subtype-associated regions.** The barplots illustrate individual GISTIC2 regions of strongest subtype association from Figure 3C of the main manuscript. Each individual barplot displays the number of tumors ( $y$ -axis) of particular subtype ( $x$ -axis) that carry either a 1-copy gain (yellow) or  $\geq 2$ -copy gain (red) in the region indicated at the top of each plot.

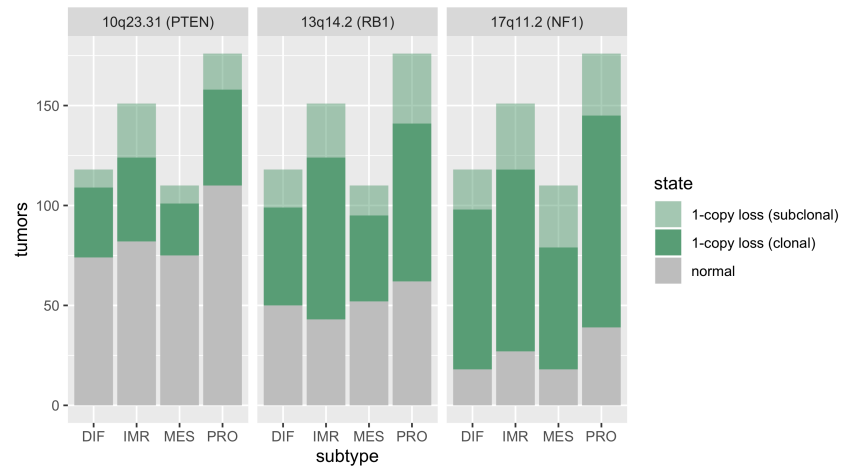

**Figure S5: Regions of frequent loss.** The barplots illustrate previously reported regions of frequent loss. As in Figure S4, each individual barplot displays the number of tumors ( $y$ -axis) of particular subtype ( $x$ -axis) that carry a 1-copy loss (green) either clonal (solid color) or subclonal (transparent color).

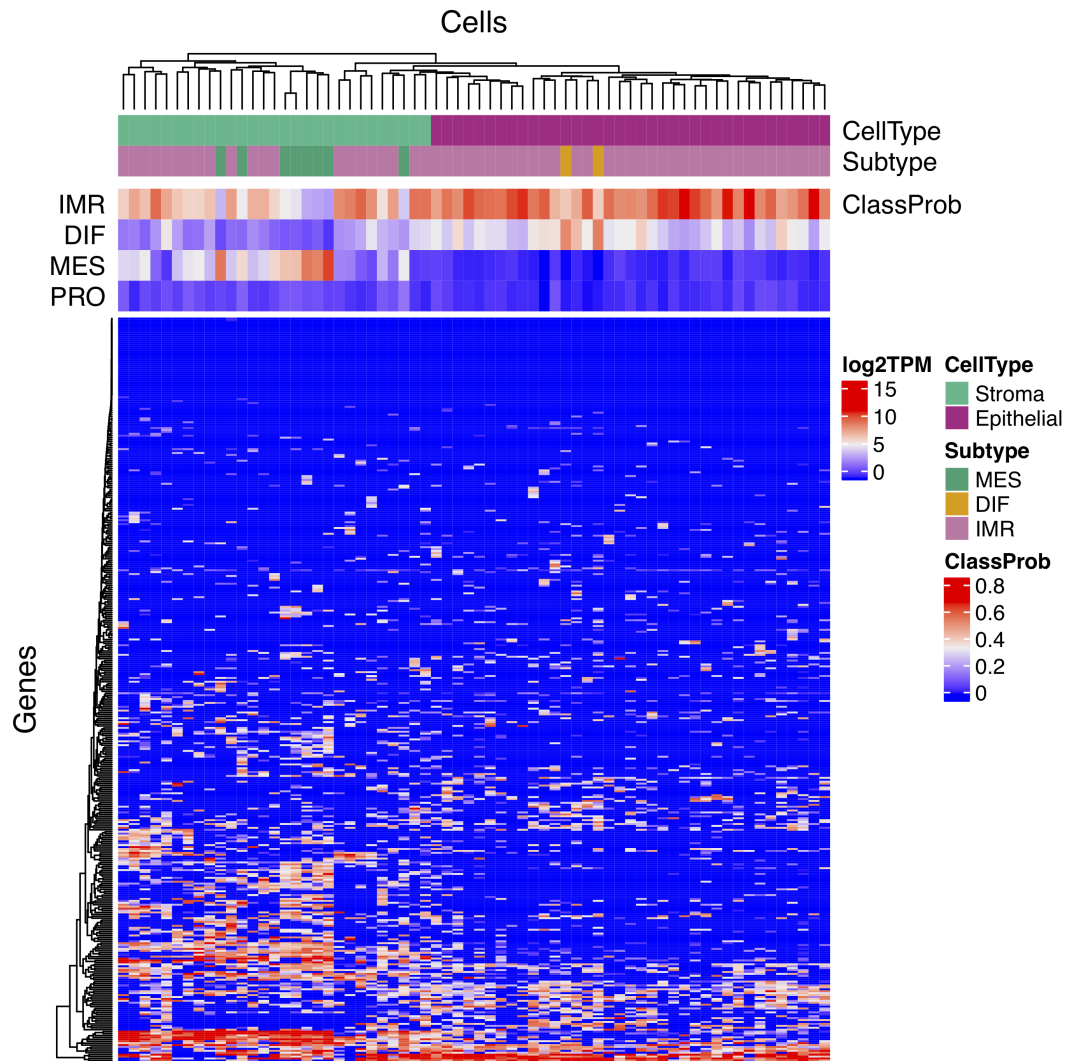

**Figure S6: Single cell subtyping with 800 genes.** The heatmap depicts log<sub>2</sub> TPM expression values of the extended 800-gene signature (rows) across 66 cells (columns). The annotation bars at the top show resulting subtype calls (*Subtype*), previous characterization of cells as epithelial or stromal (*CellType*), and classification probabilities for each subtype (*ClassProb*).
